# Supplementary material for: A Density-Dependent Switch Drives Stochastic Clustering and Polarization of Signaling Molecules
Source: PubMed Central journal article supplement (PMC3213192; doi:10.1371/journal.pcbi.1002271), 2011-11-10

Figure S1

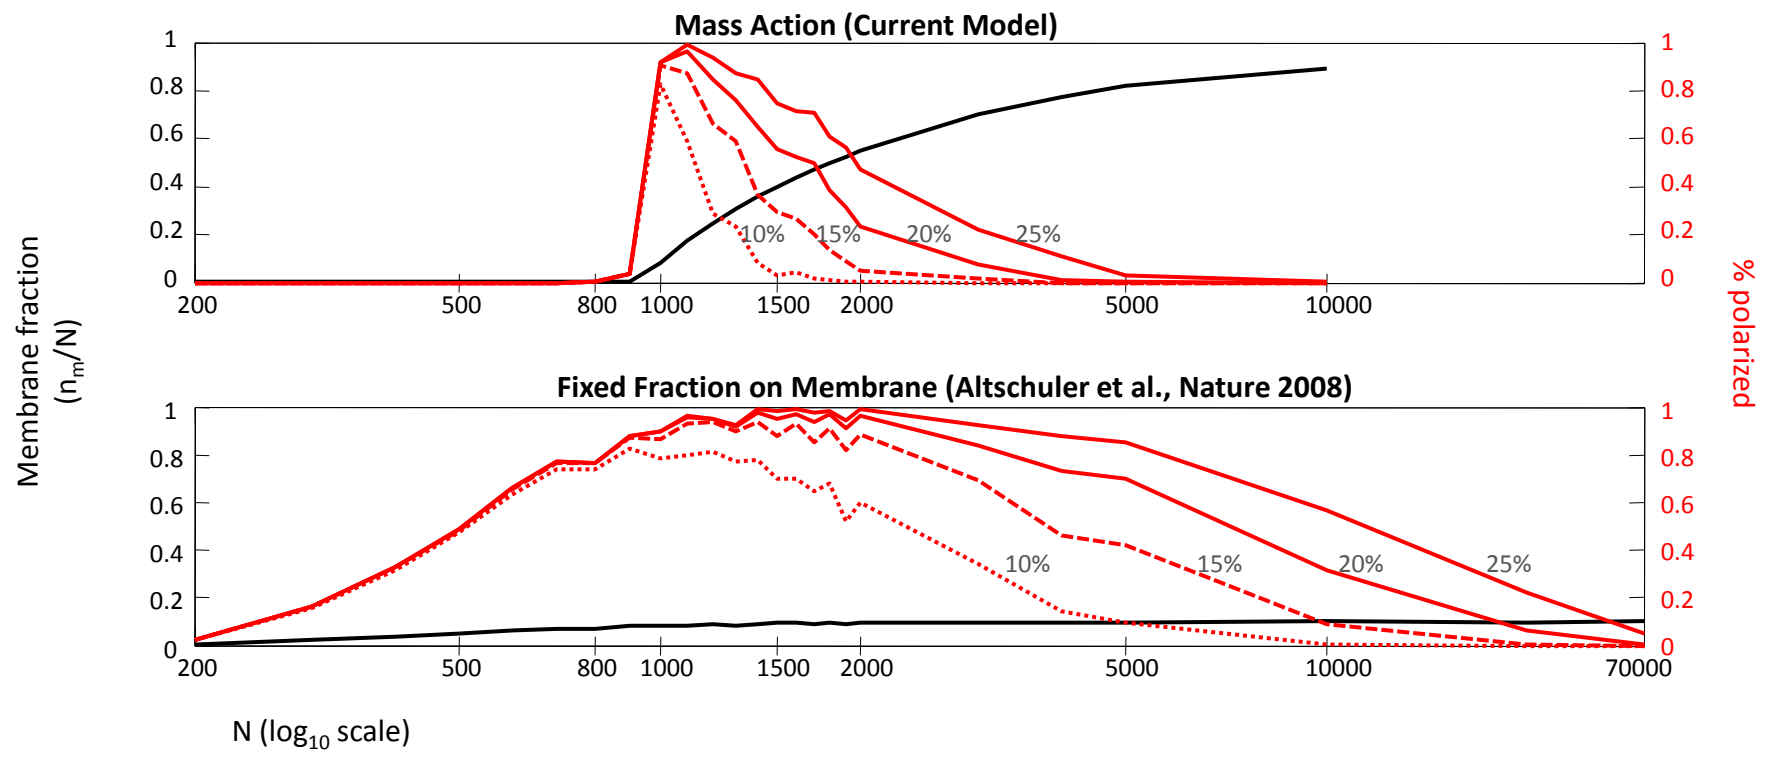

Supplement: pcbi.1002271.s001.pdf [file pcbi.1002271.s001.pdf]
